# Supplementary material
Source: PubMed Central journal article supplement (PMC2493480)
Supplement: 01239.2007_1.pdf [file 01239.2007_1.pdf]

**Supplementary Table 1) Passive membrane properties and action potentials  
parameters of NCM neurons (n=13)**

|        | $C_m$ (pF) | $E_r$ (mV) | $R_{in}$<br>(M $\Omega$ ) | AP thres<br>(mV) | AP peak<br>(mV) | AP rt<br>(ms) | AP dt<br>(ms) | AP hw<br>(ms) |
|--------|------------|------------|---------------------------|------------------|-----------------|---------------|---------------|---------------|
| Mean   | 12.5       | -64.8      | 260                       | -45              | 48.7            | 0.4           | 0.8           | 1.0           |
| S.E.M. | 2.0        | 3.6        | 52                        | 1.2              | 4               | 0.05          | 0.08          | 0.07          |

Legend:  $C_m$ = membrane capacitance;  $E_r$ =resting membrane potential;  $R_{in}$  = input resistance; AP thres = action potential threshold; AP peak = action potential peak; AP rt = action potential rise time; AP dt = action potential decay time; AP hw = action potential half-width.
